# Supplementary material for: CuS@PDA–FA nanocomposites: a dual stimuli-responsive DOX delivery vehicle with ultrahigh loading level for synergistic photothermal–chemotherapies on breast cancer
Source: Royal Society of Chemistry journal article supplement (doi:10.1039/c9tb02440a), 2020-01-01
Supplement: c9tb02440a1.pdf [file c9tb02440a1.pdf]

# **CuS@PDA–FA Nanocomposites: A Dual Stimuli-responsive DOX Delivery Vehicle with Ultrahigh Loading level for Synergistic Photothermal-chemotherapies on Breast Cancer**

Shang-Qing Zhang<sup>a</sup>, Xun Liu<sup>a</sup>, Qi-Xuan Sua<sup>a</sup>, Omar Johnson<sup>b</sup>, Ting Yang<sup>a</sup>, Ming-Li Chen<sup>a\*</sup>, Jian-  
Hua Wang<sup>b\*</sup>, Wei Chen<sup>b\*</sup>

<sup>a</sup> Research Center for Analytical Sciences, Department of Chemistry, College of Sciences,  
Northeastern University, Shenyang 110819, China

<sup>b</sup> Department of Physics, The University of Texas at Arlington, Arlington, Texas 76019-0059,  
United States

## **Corresponding Author**

\*E-mail: [chenml@mail.neu.edu.cn](mailto:chenml@mail.neu.edu.cn) (M. L. Chen); [jianhuajrz@mail.neu.edu.cn](mailto:jianhuajrz@mail.neu.edu.cn) (J. H. Wang);

[weichen@uta.edu](mailto:weichen@uta.edu) (W. Chen).

Tel: +86-24-83688944; 817-272-1064.

## **Electronic Supplementary Information**

## Supplementary Experimental Section

### Preparation of citrate coated CuS and PDA

For CuS preparation, 0.2 mmol  $\text{CuCl}_2 \cdot 2\text{H}_2\text{O}$  and 0.136 mmol sodium citrate were added in 100 mL DI water. Then, 20 mL  $\text{Na}_2\text{S} \cdot 9\text{H}_2\text{O}$  solution (10 mM) was added and stirred for 5 min at room temperature. The mixed solution was heated at 90 °C for 30 min and put rapidly into an ice water bath to cool down. Finally, the citrate-coated CuS nanoparticles were obtained.<sup>1</sup>

For PDA preparation, 300  $\mu\text{L}$   $\text{NH}_3 \cdot \text{H}_2\text{O}$  solution, 4 mL ethanol and 9 mL water were mixed and stirred for 30 min. 1 mL DA solution (50 mg  $\text{mL}^{-1}$ ) was then added into the above mixture. Finally, the solution was stirred at 30 °C for 24 h to obtain PDA nanoparticles.<sup>2</sup>

### Calculation of photothermal conversion efficiency

According to previous reports,<sup>3,4</sup> the important calculation processes are listed below.

$$\theta = \frac{T - T_{surr}}{T_{max} - T_{surr}} \quad (1)$$

$$t = -\tau_s \cdot \ln\theta \quad (2)$$

These formulas were applying to the cooling process without laser irradiation. The  $t$  is the cooling time,  $T$  is the corresponding temperature,  $T_{max}$  is the maximum system temperature and  $T_{surr}$  is the ambient temperature of surroundings.  $\tau_s$  is the system time constant which can be obtained by inducing the Equation (2)

$$hS = \frac{m \cdot C_{H_2O}}{\tau_s} \quad (3)$$

$$\eta = \frac{hS(T_{max} - T_{surr}) - Q_{Dis}}{I(1 - 10^{-A_{808}})} \quad (4)$$

$m$  is the mass of CuS, PDA, CuS@PDA or CuS@PDA-FA solution,  $C_{H_2O}$  is the specific heat capacity of water. The  $hS$  can be obtained by Equation (3). The energy input by pure solvent ( $Q_{dis}$ )

was measured to be 28 mW.  $A_{980}$  is the absorbance of the materials we made at 808 nm. Finally, we can calculate the photothermal conversion efficiency  $\eta$ .

### **Biocompatibility of CuS and PDA**

Firstly, the MCF-7 cells were seeded in 96-well plates and incubated 24 h. Then, the cells were incubated with the fresh medium including citrate-coated CuS, PDA, CuS@PDA (100, 200, 500  $\mu\text{g mL}^{-1}$ ). After incubating for 20 h, 10  $\mu\text{L}$  MTT solution (5.0  $\text{mg mL}^{-1}$ ) was added in each well and the cells were cultured for further 4 h. 100  $\mu\text{L}$  DMSO was added to dissolve the generated formazan crystals. Thereafter, the absorbance was measured at 490 nm by a microplate reader.

### **Effects of laser irradiation of power density on MCF-7 cells**

The effect of laser irradiation of power density on MCF-7 cells was also studied by an MTT assay. We used the 808 nm laser of different power densities (0.6, 0.8, 1.0, 1.5, 2.7  $\text{W cm}^{-2}$ ) to irradiate cells for 5 min and detected the cell viability by a microplate reader to verify the effect of laser irradiation on cells.

### **Cellular uptake of CuS@PDA-FA/DOX**

Typically, MCF-7 cells were seeded in glass-bottom cell culture dishes and grown for 24 h. The cells were then cultured with CuS@PDA-FA/DOX for 0.5, 1, 2 and 4 h and washed with 10 mM PBS buffer. Subsequently, the cells were fixed with 4% paraformaldehyde. After staining with the DAPI solution for 10 min, the cells were observed by a confocal microscope. The effect of laser irradiation on cellular uptake was also studied. The MCF-7 cells were incubated for 0.5 h with 100  $\mu\text{g mL}^{-1}$  CuS@PDA-FA/DOX in glass-bottom dishes. There were two groups. In Group 1, the cells were irradiated for 5 min by 808 nm laser (0.8  $\text{W cm}^{-2}$ ). In Group 2, the cells were not irradiated. All

cells were cultured for another 0.5 h and washed by 10 mM PBS buffer. The cells were fixed and stained. Finally, the cells were observed by a confocal microscope.

## Supplementary Figures

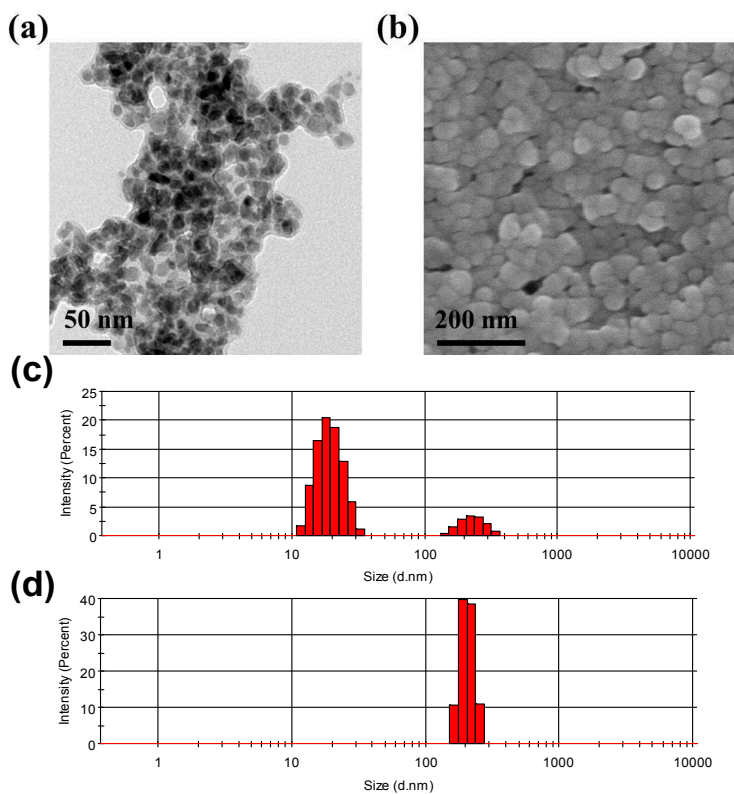

**Fig. S1** (a) TEM image of CuS@PDA-FA , (b) SEM image of CuS@PDA-FA, (c) Dynamic light scattering analyses of CuS@PDA (c) and CuS@PDA-FA (d).

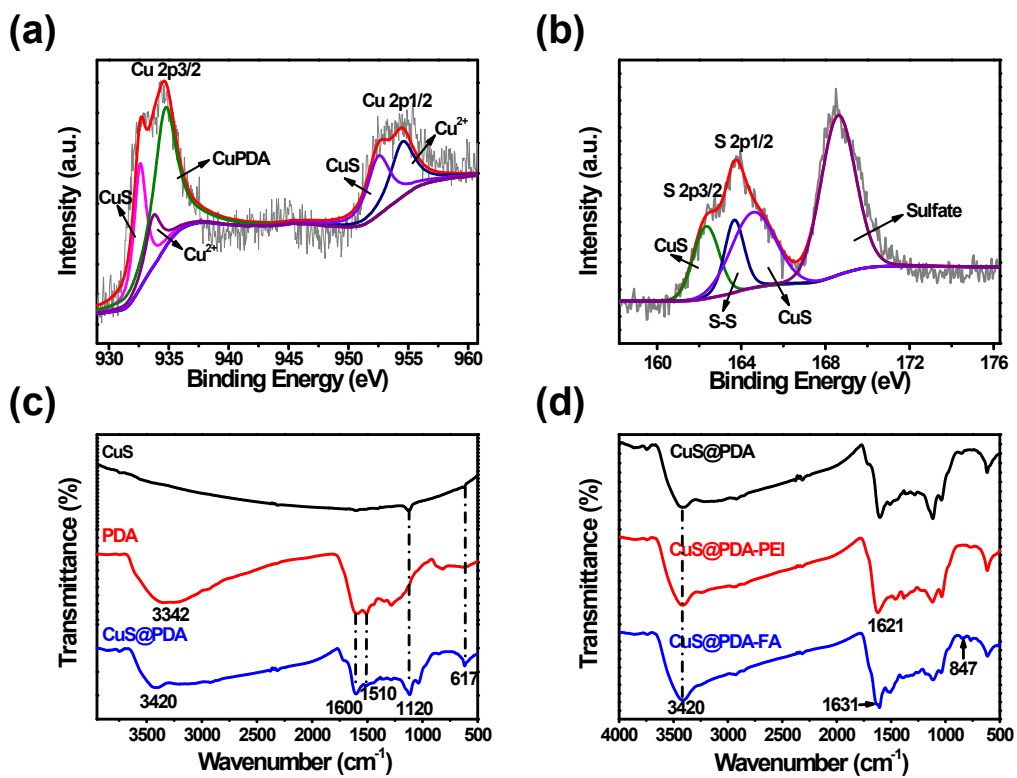

**Fig. S2** XPS scans of CuS@PDA: (a) Cu 2p spectrum and (b) S 2p spectrum; FTIR spectra of (c) CuS, PDA, CuS@PDA and (d) CuS@PDA, CuS@PDA-PEI, and CuS@PDA-FA.

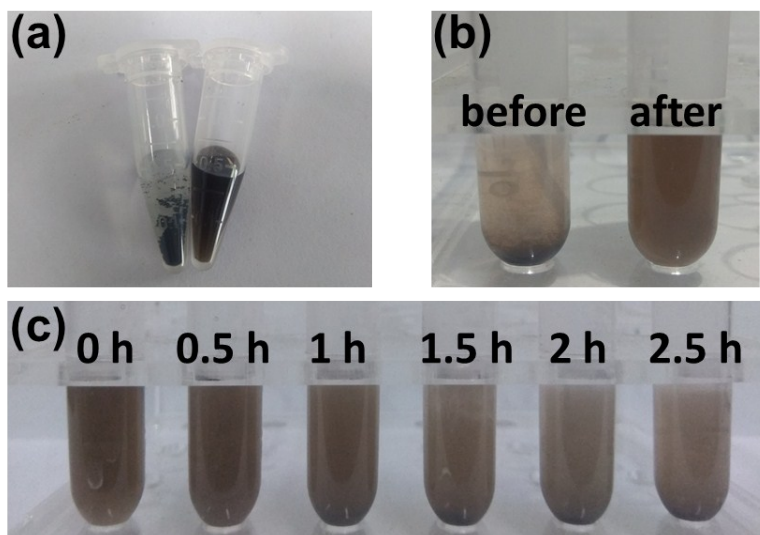

**Fig. S3** (a) Photograph of CuS (left) and CuS@PDA (right) under the 808 nm laser irradiation ( $1.5 \text{ W cm}^{-2}$ ) for 10 min, (b) Photos of the CuS@PDA-FA/DOX dispersion before/after sonication, (c) Photos of the CuS@PDA-FA/DOX dispersion standing at different times.

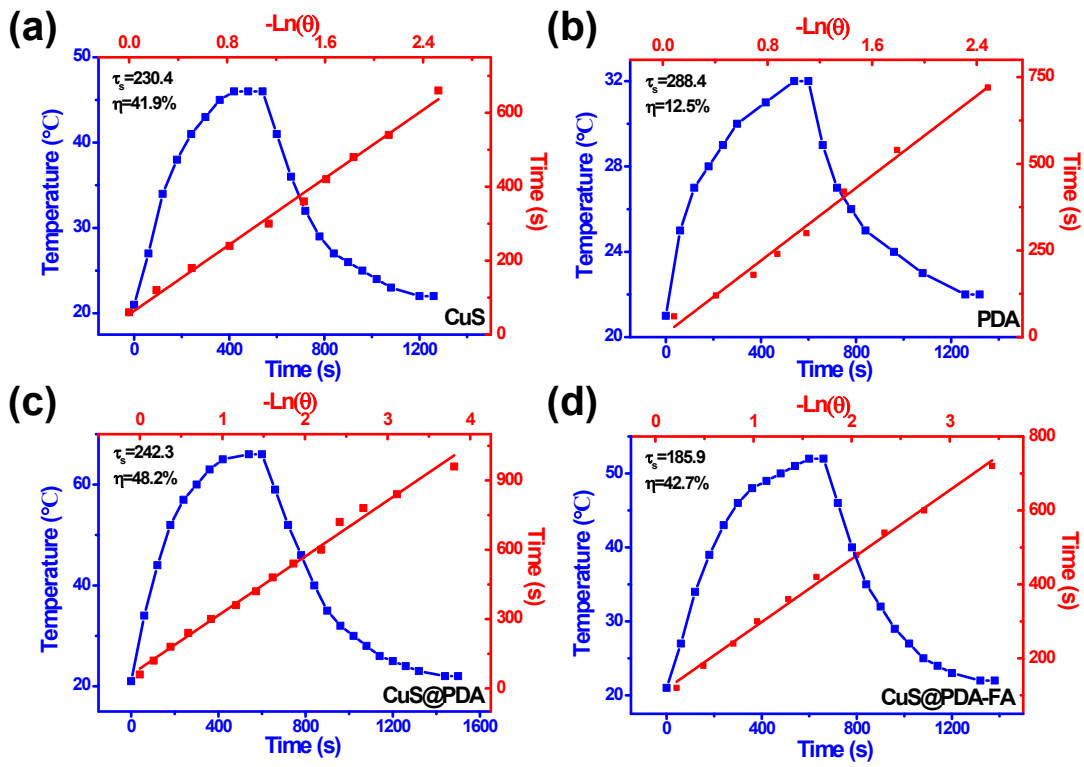

**Fig. S4** Steady-state heating curve of (a)CuS, (b)PDA, (c)CuS@PDA and (d)CuS@PDA-FA



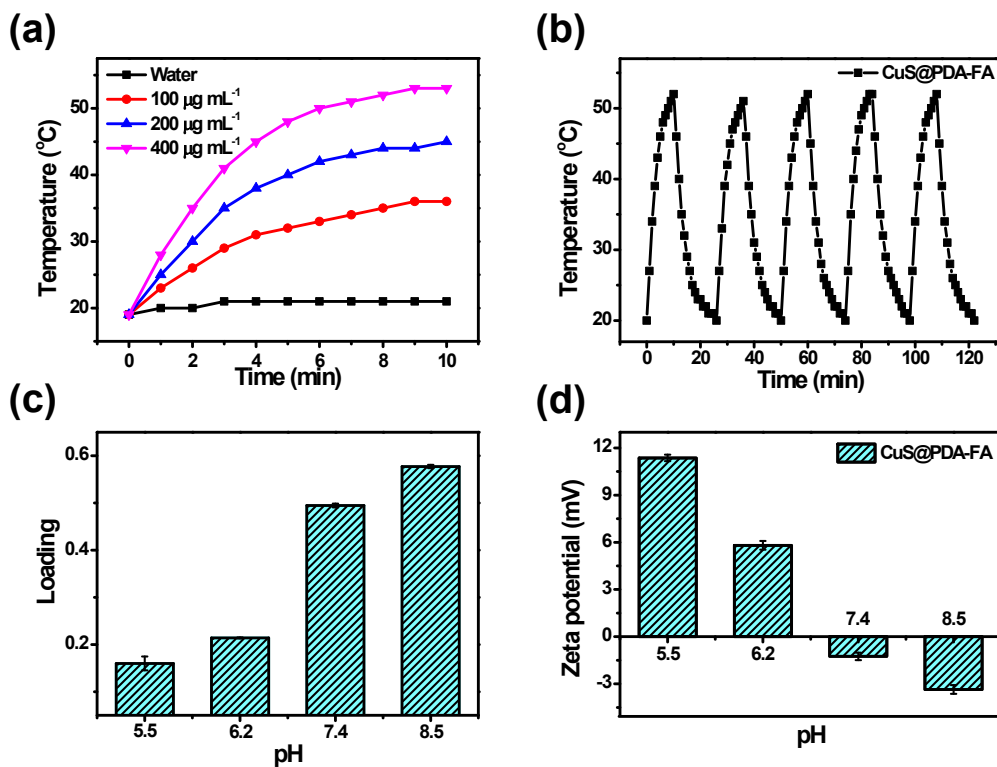

**Fig. S5** (a) The photothermal profiles of DI water and CuS@PDA-FA NPs solution with different concentrations under 808 nm laser irradiation ( $1.5 \text{ W cm}^{-2}$ ). (b) Photothermal stability study of CuS@PDA NPs. (c) DOX loading efficiency on CuS@PDA-FA in 10 mM PBS buffer with various pH values. (d) Zeta potential of CuS@PDA-FA in PBS buffer with different pH values.

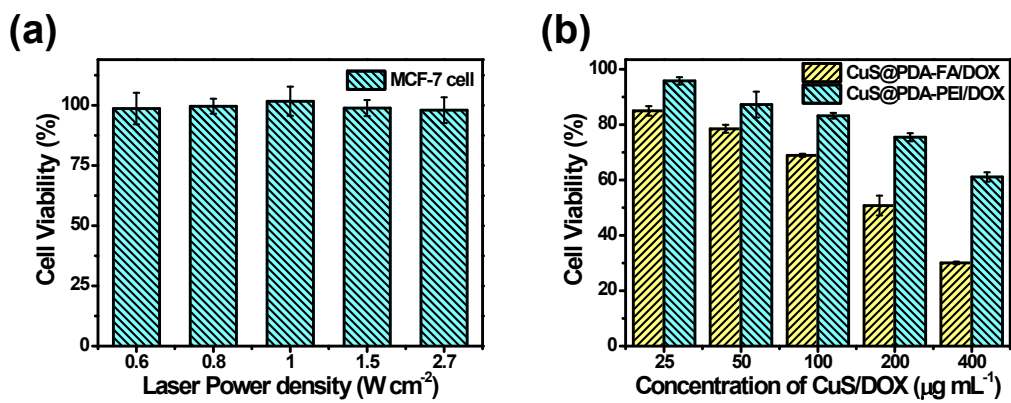

**Fig. S6** (a) Cell viability of MCF-7 cells incubated with different power densities of laser irradiation.

(b) Cell viability of MCF-7 cells incubated with CuS@PDA-FA/DOX and CuS@PDA-FA/DOX nanocomposites at various concentrations.

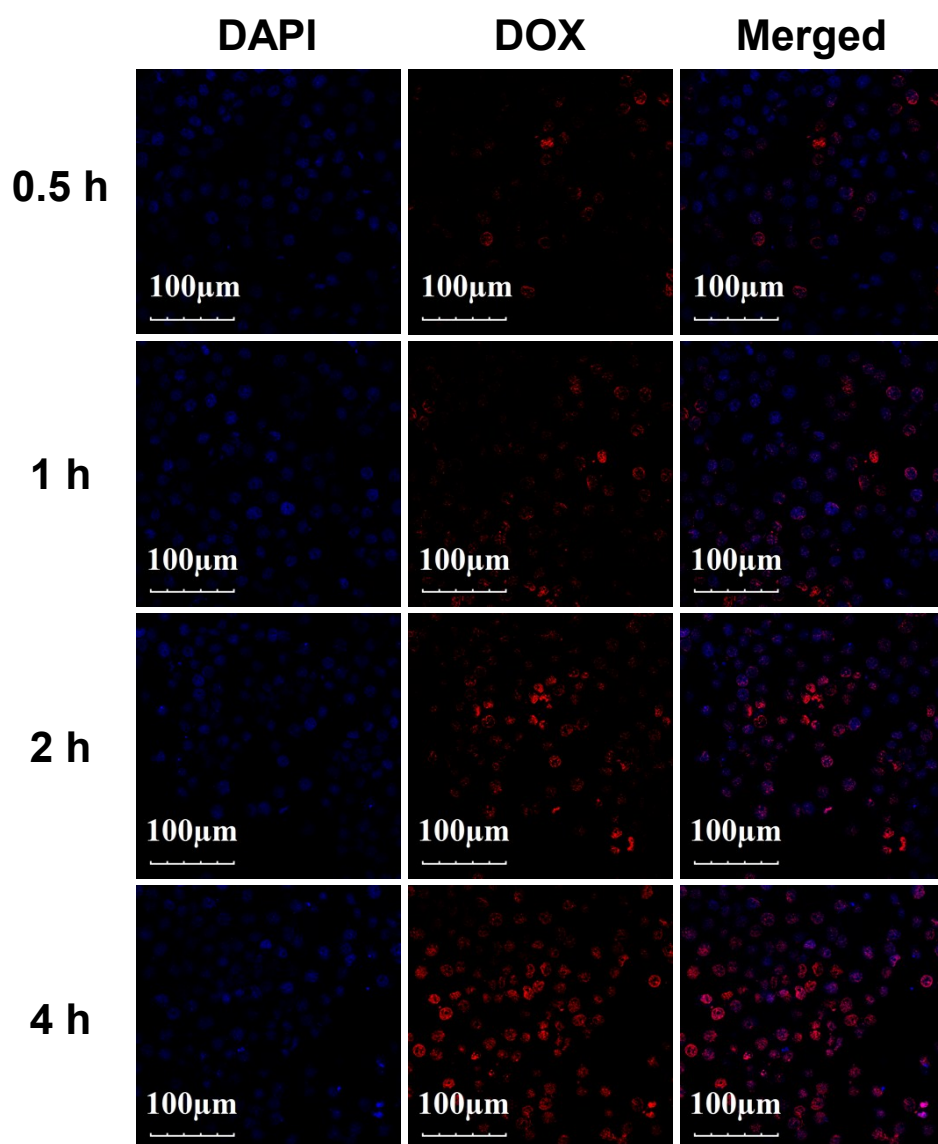

**Fig. S7** CLSM images of MCF-7 cells incubated with CuS@PDA-FA/DOX nanocomposites for 0.5, 1, 2 and 4 h, respectively.

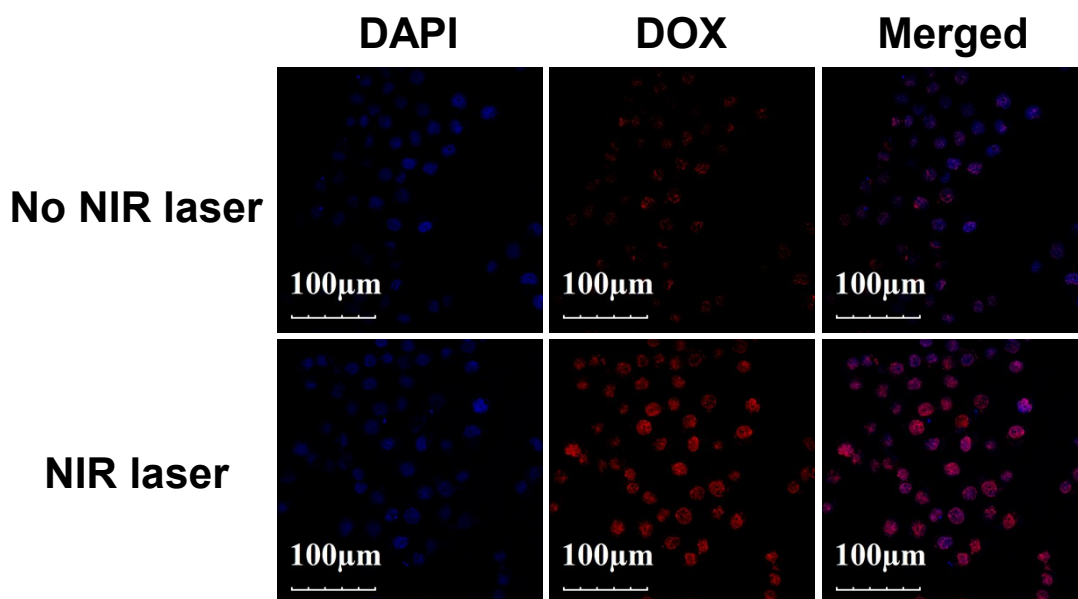

**Fig. S8** CLSM images of MCF-7 cells incubated with CuS@PDA-FA/DOX nanocomposites for 1 h without or with NIR irradiation ( $0.8 \text{ W cm}^{-2}$ , 5 min).

**Table S1** Summary of DOX loading level of various materials

| Materials                   | Loading mechanism                                                                                                         | Loading level (mg mg <sup>-1</sup> ) | Reference |
|-----------------------------|---------------------------------------------------------------------------------------------------------------------------|--------------------------------------|-----------|
| CuS@copolymer               | electrostatic interaction,<br>hydrogen bonding                                                                            | 0.153                                | 5         |
| MoS <sub>2</sub> @BSA       | electrostatic interaction, the<br>2D nature of MoS <sub>2</sub> and the<br>high surface area of flower-<br>like structure | 0.34                                 | 6         |
| CuS-PAA                     | electrostatic interaction                                                                                                 | 0.21                                 | 7         |
| Ultrasmall Pd<br>nanosheets | Pd-N coordination bonding                                                                                                 | 0.053                                | 8         |
| PB@mSiO <sub>2</sub> -PEG   | electrostatic interaction                                                                                                 | 1.31                                 | 9         |
| CDPGM                       | $\pi$ - $\pi$ stacking and hydrogen-<br>bonding interaction                                                               | 0.40                                 | 2         |
| HA capped MSNs              | the surface-to-volume ratio<br>and strong electrostatic<br>interaction                                                    | 0.14                                 | 10        |
| CuS/GO                      | electrostatic interaction                                                                                                 | 1.75                                 | 11        |
| CuS@PDA-FA                  | electrostatic interaction, $\pi$ - $\pi$<br>stacking and large specific<br>surface area                                   | 4.2                                  | this work |

## References

1. Y. Wang, X. Liu, G. Deng, J. Sun, H. Yuan, Q. Li, Q. Wang and J. Lu, *Nanoscale*, 2018, **10**,

2866-2875.

2. S. Wang, J. Lin, Z. Wang, Z. Zhou, R. Bai, N. Lu, Y. Liu, X. Fu, O. Jacobson, W. Fan, J. Qu, S. Chen, T. Wang, P. Huang and X. Chen, *Advanced Materials*, 2017, **29**, 1701013.
3. Q. Tian, F. Jiang, R. Zou, Q. Liu, Z. Chen, M. Zhu, S. Yang, J. Wang, J. Wang and J. Hu, *ACS Nano*, 2011, **5**, 9761-9771.
4. C. Wu, S. Wang, J. Zhao, Y. Liu, Y. Zheng, Y. Luo, C. Ye, M. Huang and H. Chen, *Advanced Functional Materials*, 2019, **29**, 1901722.5. L. Zhang, Z. Yang, W. Zhu, Z. Ye, Y. Yu, Z. Xu, J. Ren and P. Li, *ACS Biomaterials Science & Engineering*, 2017, **3**, 1690-1701.
6. L. Chen, W. Feng, X. Zhou, K. Qiu, Y. Miao, Q. Zhang, M. Qin, L. Li, Y. Zhang and C. He, *RSC Advances*, 2016, **6**, 13040-13049.
7. X. Wang, Q. Zhang, L. Zou, H. Hu, M. Zhang and J. Dai, *RSC Advances*, 2016, **6**, 20949-20960.
8. S. Tang, M. Chen and N. Zheng, *Nano Research*, 2015, **8**, 165-174.
9. Y. Y. Su, Z. Teng, H. Yao, S. J. Wang, Y. Tian, Y. L. Zhang, W. F. Liu, W. Tian, L. J. Zheng, N. Lu, Q. Q. Ni, X. D. Su, Y. X. Tang, J. Sun, Y. Liu, J. Wu, G. F. Yang, G. M. Lu and L. J. Zhang, *ACS Appl Mater Interfaces*, 2016, **8**, 17038-17046.
10. C. Chen, W. Sun, X. Wang, Y. Wang and P. Wang, *International Journal of Biological Macromolecules*, 2018, **111**, 1106-1115.
11. L. Han, Y.-N. Hao, X. Wei, X.-W. Chen, Y. Shu and J.-H. Wang, *ACS Biomaterials Science & Engineering*, 2017, **3**, 3230-3235.
